# Supplementary material for: Glycomacropeptide Safety and Its Effect on Gut Microbiota in Patients with Phenylketonuria: A Pilot Study
Source: MDPI journal article supplement (doi:10.3390/nu14091883), 2022-04-29
Supplement: s1 [file s1]

**Supplementary Table S1.** Median values and interquartile ranges (IQR) of nutritional values. Statistical significance was determined through a non-parametric Wilcoxon paired signed-rank test; p-values below 0.05 were considered as significant.

| Nutritional Variable         | Median value at T0;<br>IQR (n=9) | Median value at T1;<br>IQR (n=9) | p-value |
|------------------------------|----------------------------------|----------------------------------|---------|
| <b>Energy</b>                |                                  |                                  |         |
| Kcals/day                    | 1690; 101                        | 1825; 628                        | 0.820   |
| <b>Protein</b>               |                                  |                                  |         |
| % en                         | 15.6; 2.7                        | 13.8; 4.1                        | 0.301   |
| g/day                        | 73.5; 16.4                       | 68.3; 17.1                       | 1       |
| g/day (from PS)              | 53; 10.4                         | 56.7; 12.7                       | 0.652   |
| %GMP                         | 0; 0                             | 79.3; 47.9                       | 0.009   |
| % AA                         | 100; 0                           | 20.7; 47.9                       | 0.009   |
| Phenylalanine (mg/day)       | 608.6; 588.8                     | 905; 328.3                       | 0.359   |
| <b>Carbohydrate</b>          |                                  |                                  |         |
| % en                         | 57.6; 4.1                        | 57.2; 4.5                        | 0.570   |
| <b>Lipids</b>                |                                  |                                  |         |
| % en                         | 27.5; 5                          | 26.8; 4.3                        | 0.250   |
| <b>Fiber</b>                 |                                  |                                  |         |
| Overall (g/day)              | 23.9; 8.4                        | 23.9; 5.7                        | 1       |
| soluble fiber (g/day)        | 1.3; 0.9                         | 1.9; 0.4                         | 0.250   |
| <b>Vitamins and minerals</b> |                                  |                                  |         |
| Vit B12 (µg/day)             | 10.7; 2.6                        | 5.4; 7;0                         | 0.008   |
| Folate (µg/day)              | 487.4; 101.0                     | 339.4; 267.6                     | 0.164   |
| Vitamin D (µg/day)           | 28.0; 12.5                       | 22.5; 5.2                        | 0.203   |
| Calcium (mg/day)             | 2038.4; 524.7                    | 1392; 535.7                      | 0.039   |
| Phosphorus (mg/day)          | 1189.7; 318.2                    | 1310.0; 327.9                    | 0.203   |
| Iron (mg/day)                | 19.6; 9.6                        | 18.7; 6.8                        | 0.910   |
| <b>Glycemic index</b>        | 64; 6.9                          | 68.8; 5.5                        | 0.074   |
| <b>Glycemic load</b>         | 177; 49.1                        | 222.8; 104                       | 0.820   |

**Supplementary Table S2.** Fecal SCFAs concentrations (μmol/mg)

|             | Median value<br>at T0 (IQR) | Median value<br>at T1 (IQR) | <i>p</i> -value |
|-------------|-----------------------------|-----------------------------|-----------------|
| Acetate     | 25.8 (13.9)                 | 31.6 (34)                   | 0.432           |
| Propionate  | 20.1 (9.2)                  | 20.3 (14.6)                 | 0.432           |
| Butyrate    | 12.7 (12.4)                 | 9.8 (9.9)                   | 0.492           |
| Isobutyrate | 1.5 (1.2)                   | 1.8 (1.3)                   | 0.922           |
| Isovalerate | 1.5 (0.7)                   | 1.9 (2.4)                   | 0.477           |

**Supplementary Figure S1.** SCFA quantification among patients. Paired boxplot of the SCFA analyzed, reporting the trend for each patient through the time of GMP intervention. No significant differences were observed.

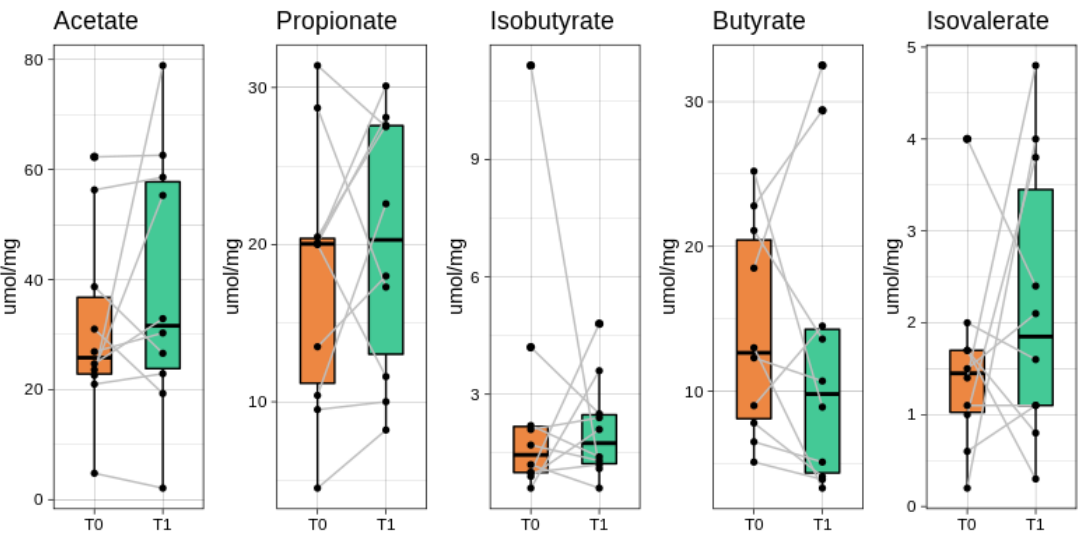

**Supplementary Table S3.** Taxonomy relative abundances at T0 and T1. Bacterial relative abundances are reported at phylum, family, and genus phylogenetic levels (expressed as median and interquartile range). Statistical differences were evaluated through a non-parametric Wilcoxon paired signed-rank test; only significant p-values ( $p < 0.05$ ) are shown.

| Taxonomy        |                    |                                            | Median (IQR)  |               | p-value |
|-----------------|--------------------|--------------------------------------------|---------------|---------------|---------|
| Phylum          | Family             | Genus                                      | T0            | T2            |         |
| Firmicutes      | Ruminococcaceae    |                                            | 56.75 (18.53) | 75.86 (28.04) |         |
|                 |                    |                                            | 22.88 (15.9)  | 40.22 (35.6)  |         |
|                 |                    | <i>Subdoligranulum</i>                     | 7.04 (11.99)  | 17.66 (15.88) |         |
|                 |                    | <i>Faecalibacterium</i>                    | 3.56 (5.38)   | 4.95 (8.84)   |         |
|                 |                    | <i>Ruminococcus 2</i>                      | 1.01 (4.13)   | 0.84 (1.81)   |         |
|                 |                    | <i>[Eubacterium] coprostanoligenes gr.</i> | 1.42 (1.94)   | 0.02 (0.17)   |         |
|                 | Lachnospiraceae    |                                            | 23.61 (11.11) | 26.41 (9.78)  | 0.023   |
|                 |                    | <i>Blautia</i>                             | 6.39 (7.91)   | 4.07 (4.08)   |         |
|                 |                    | <i>Lachnospiraceae NK4A136 group</i>       | 1.57 (3.65)   | 2.32 (3.27)   |         |
|                 |                    | <i>Lachnoclostridium</i>                   | 2.12 (0.5)    | 1.33 (0.4)    |         |
|                 |                    | <i>Anaerostipes</i>                        | 0.73 (1.35)   | 0.65 (1.4)    |         |
|                 |                    | <i>uncultured (Lachnospiraceae)</i>        | 1.08 (1.15)   | 0.49 (0.29)   |         |
|                 |                    | <i>Eisenbergiella</i>                      | 0.72 (1.21)   | 0.16 (0.87)   |         |
|                 |                    | <i>Roseburia</i>                           | 0.33 (0.46)   | 0.23 (0.67)   |         |
|                 |                    | <i>Agathobacter</i>                        | 0.23 (0.45)   | 2.61 (3.41)   |         |
|                 | Acidaminococcaceae |                                            | 1.78 (4.81)   | 0.44 (2.6)    | 0.008   |
|                 |                    | <i>Phascolarctobacterium</i>               | 0.33 (3.18)   | 0.12 (1.11)   |         |
|                 | Veillonellaceae    |                                            | 1.18 (1.71)   | 0.61 (1.39)   |         |
|                 |                    | <i>Veillonella</i>                         | 0.02 (0.19)   | 0.09 (0.25)   |         |
|                 |                    | <i>Dialister</i>                           | 0.03 (1.44)   | 0.52 (1.18)   |         |
|                 | Streptococcaceae   |                                            | 0.34 (0.54)   | 0.26 (0.75)   |         |
|                 |                    | <i>Streptococcus</i>                       | 0.34 (0.54)   | 0.26 (0.75)   |         |
| Bacteroidetes   | Bacteroidaceae     |                                            | 29.56 (19.73) | 15.49 (20.73) |         |
|                 |                    |                                            | 21.75 (20.02) | 13.64 (19.38) |         |
|                 |                    | <i>Bacteroides</i>                         | 21.75 (20.02) | 13.64 (19.38) |         |
|                 | Tannerellaceae     |                                            | 0.97 (1.55)   | 0.4 (1.87)    |         |
|                 |                    | <i>Parabacteroides</i>                     | 0.97 (1.55)   | 0.4 (1.87)    |         |
|                 | Rikenellaceae      |                                            | 1.6 (1.77)    | 0.75 (1.51)   |         |
|                 |                    | <i>Alistipes</i>                           | 1.6 (1.77)    | 0.75 (1.51)   |         |
|                 | Prevotellaceae     |                                            | 0.00 (0.03)   | 0.00 (0.18)   |         |
| Verrucomicrobia | Akkermansiaceae    |                                            | 2.26 (14.78)  | 0.01 (0.13)   |         |
|                 |                    |                                            | 2.26 (14.78)  | 0.01 (0.13)   |         |
|                 |                    | <i>Akkermansia</i>                         | 2.26 (14.78)  | 0.01 (0.13)   |         |
| Actinobacteria  | Bifidobacteriaceae |                                            | 3.24 (3.37)   | 6.61 (5.35)   |         |
|                 |                    |                                            | 2.09 (2.54)   | 2.09 (6.25)   |         |
|                 |                    | <i>Bifidobacterium</i>                     | 2.08 (2.53)   | 2.08 (6.25)   |         |
| Proteobacteria  | Enterobacteriaceae |                                            | 0.97 (1.57)   | 1.38 (2.58)   |         |
|                 |                    |                                            | 0.24 (0.52)   | 0.7 (1.33)    |         |
|                 |                    | <i>Escherichia-Shigella</i>                | 0.24 (0.52)   | 0.7 (1.33)    |         |
